# Supplementary material for: A novel form of wasp mimicry in a new species of praying mantis from the Amazon rainforest, Vespamantoida wherleyi gen. nov. sp. nov. (Mantodea, Mantoididae)
Source: PeerJ. 2019 Oct 17;7:e7886. doi: 10.7717/peerj.7886 (PMC6812689; doi:10.7717/peerj.7886)
Supplement: Supplemental Information 4 — Verbatim locality data provided for each specimen from label data. Institution of deposition abbreviations appear as the prefix to the database code included (when present), which are Cleveland Museum of Natural History (CMNH), Muséum national d’Histoire naturelle (MNHN), and National Museum of Natural History (USNM). [file peerj-07-7886-s004.xlsx]

## Sheet: Sheet1
Species	Locality	Database Code
Vespamantoida wherleyi	Peru: Loreto Province, Madre Selva Biological Research Station -3.621 -72.2474 10 February 2013 - 17 February 2013 Svenson, G. J. (Gavin J.)	CMNHENT0129976
Vespamantoida toulgoeti	French Guiana: Cayenne, 2km E Amazonia, 275m 4.5653 -52.1839 14 February 2005 McCabe, T. (Tim)	CMNHENT0130060
Vespamantoida toulgoeti	French Guiana: Cayenne, Kaw Mountain Reserve, 1km W Amazonia, 290m 4.5689 -52.2103 7 January 2013 - 17 January 2013 Romack, H.	CMNHENT0130146
Vespamantoida toulgoeti	French Guiana: Cayenne, Saint-Ã‰lie, near Sinnamary, 48m 5.2975 -53.0521 8 May 2011 - 10 May 2011 Rivera, J. at light	CMNHENT0131992
Vespamantoida toulgoeti	Guyane Française, Montagne des Chevaux 4.71666° -52.4° - 04.x.2014 Société entomologique Antille-Guyane leg.	N/A - MNHN
Vespamantoida toulgoeti	Guyane Française, Montagne des Chevaux 4.71666° -52.4° - 12.iv.2014 Société entomologique Antille-Guyane leg.	N/A - MNHN
Vespamantoida toulgoeti	Guyane Française, Montagne des Chevaux 4.71666° -52.4° - 26.xii.2015 Société entomologique Antille-Guyane leg.	N/A - MNHN
Vespamantoida toulgoeti	Guyane Française, Montagne des Chevaux 4.71666° -52.4° - 30.v.2015 Société entomologique Antille-Guyane leg.	N/A - MNHN
Paramantoida amazonica	Venezuela, Cerro de la Neblina, base camp, 140m, Amazonas 0.8069 -66.0053 1 March 1984 - 10 March 1984 Davis, D. & McCabe, T. (Tim)	USNMENT01091954
Paramantoida amazonica	Venezuela, Cerro de la Neblina, base camp, 140m, Amazonas 0.8069 -66.0053 21 February 1984 - 29 February 1984 Davis, D. & McCabe, T. (Tim)	USNMENT01091953
Mantoida sp.	Argentina, Valle de Calamuchita, Cordoba -31.9167 -64.6333 4 August 1965 - 23 August 1965 Lau, A. B. (Alfred Bernhard)	USNMENT01091454
Mantoida sp.	Bolivia: Departmento Santa Cruz, near Buena Vista, 390m -17.6517 -63.5856 14 November 2009 Svenson, G. J. (Gavin J.) ultraviolet light/mercury vapor light	CMNHENT0130147
Mantoida sp.	Bolivia: Departmento Santa Cruz, near Buena Vista, 390m -17.6517 -63.5856 14 November 2009 Svenson, G. J. (Gavin J.) ultraviolet light/mercury vapor light	CMNHENT0130148
Mantoida sp.	Bolivia: Departmento Santa Cruz, near Buena Vista, 390m -17.6517 -63.5856 14 November 2009 Svenson, G. J. (Gavin J.) ultraviolet light/mercury vapor light	CMNHENT0130151
Mantoida sp.	Bolivia: Departmento Santa Cruz, near Buena Vista, 390m -17.6517 -63.5856 14 November 2009 Svenson, G. J. (Gavin J.) ultraviolet light/mercury vapor light	CMNHENT0131931
Mantoida sp.	Bolivia: Departmento Santa Cruz, near Buena Vista, 390m -17.6517 -63.5856 14 November 2009 Svenson, G. J. (Gavin J.) ultraviolet light/mercury vapor light	CMNHENT0131932
Mantoida sp.	Bolivia: Departmento Santa Cruz, near Buena Vista, 390m -17.6517 -63.5856 14 November 2009 Svenson, G. J. (Gavin J.) ultraviolet light/mercury vapor light	CMNHENT0131933
Mantoida sp.	Bolivia: Departmento Santa Cruz, Potrerillos del Guenda, 1322ft -17.671 -63.4574 6 January 2005 - 12 January 2005 McHugh, J. (Joe)	CMNHENT0131926
Mantoida sp.	Bolivia: Departmento Santa Cruz, Potrerillos del Guenda, 1322ft -17.671 -63.4574 6 January 2005 - 12 January 2005 McHugh, J. (Joe)	CMNHENT0131927
Mantoida sp.	Bolivia: Departmento Santa Cruz, Reserva Natural Potrerillos del Guenda, elev. 400m -17.6714 -63.4575 3 November 2009 - 8 November 2009 Svenson, G. J. (Gavin J.) ultraviolet light/mercury vapor light	CMNHENT0131928
Mantoida sp.	Bolivia: Departmento Santa Cruz, Reserva Natural Potrerillos del Guenda, elev. 400m -17.6714 -63.4575 3 November 2009 - 8 November 2009 Svenson, G. J. (Gavin J.) ultraviolet light/mercury vapor light	CMNHENT0131929
Mantoida sp.	Bolivia: Departmento Santa Cruz, Reserva Natural Potrerillos del Guenda, elev. 400m -17.6714 -63.4575 3 November 2009 - 8 November 2009 Svenson, G. J. (Gavin J.) ultraviolet light/mercury vapor light	CMNHENT0131930
Mantoida sp.	Bolivia: La Paz, Abel Iturralde, San Miguel -14.51 -67.4926 24 September 2007 - 30 September 2007 Miller, K. B. (Kelly B.)	CMNHENT0131925
Mantoida sp.	Brazil, Planaltina, 1000m, cerradão, DF -15.6167 -47.6667 24 September 1985 - 6 October 1985 Miller, S. E. (Scott E.) Malaise trap	USNMENT01091408
Mantoida sp.	Brazil: Amazonas Parana do Xiboreninho, -3.25 -60 5 August 1979 Adis, Erwin & Montgomery canopy fogging	USNMENT01091446
Mantoida sp.	Brazil: Para; RioXingu Camp, ca 60 km S. Altamira -3.65 -52.3667 1 October 1986 - 7 October 1986 Spanger, P. (Paul) & Flint, O.	USNMENT01091409
Mantoida sp.	Brazil: Para; RioXingu Camp, ca 60 km S. Altamira -3.65 -52.3667 1 October 1986 - 7 October 1986 Spanger, P. (Paul) & Flint, O.	USNMENT01091410
Mantoida sp.	Brazil: Para; RioXingu Camp, ca 60 km S. Altamira -3.65 -52.3667 1 October 1986 - 7 October 1986 Spangler, P. J. (Paul J.) & Flint, O.	USNMENT01091444
Mantoida sp.	Costa Rica, Enrique Jimenez Nuñez Experimental Station, 20km SW Cañas, Guanacaste Prov., 10.3256 -85.1953 5 November 1991 - 17 November 1991 Menke, A. S. Malaise trap	USNMENT01091431
Mantoida sp.	Costa Rica, Guanacaste Prov. Estacion Exper. Enrique Jimenez Nuñez (20 km SW Cañas) 10.5 -85.25 5 November 1991 - 17 November 1991 Menke, A. (Arnold)	USNMENT01091435
Mantoida sp.	Costa Rica, Guanacaste Prov. Estacion Exper. Enrique Jimenez Nuñez (20 km SW Cañas) 10.5 -85.25 5 November 1991 - 17 November 1991 Menke, A. (Arnold)	USNMENT01091436
Mantoida sp.	Costa Rica, Guanacaste Prov. Estacion Exper. Enrique Jimenez Nuñez (20 km SW Cañas) 10.5 -85.25 5 November 1991 - 17 November 1991 Menke, A. (Arnold)	USNMENT01091437
Mantoida sp.	Costa Rica, Guanacaste Prov. Estacion Exper. Enrique Jimenez Nuñez (20 km SW Cañas) 10.5 -85.25 5 November 1991 - 17 November 1991 Menke, A. (Arnold)	USNMENT01091438
Mantoida sp.	Costa Rica, Guanacaste Prov. Estacion Exper. Enrique Jimenez Nuñez (20 km SW Cañas) 10.5 -85.25 5 November 1991 - 17 November 1991 Menke, A. (Arnold)	USNMENT01091439
Mantoida sp.	Ecuador, Limoncocha, Sucumbíos Prov. -0.4 -76.6167 24 June 1980 - 27 June 1980 Covell, C. V. (Charles V.)	USNMENT01091413
Mantoida sp.	Ecuador, Limoncocha, Sucumbíos Prov. -0.4 -76.6167 24 June 1980 - 27 June 1980 Covell, C. V. (Charles V.)	USNMENT01091414
Mantoida sp.	French Guiana 4 -53 No Date Romack, H.	CMNHENT0131966
Mantoida sp.	French Guiana 4 -53 No Date Romack, H.	CMNHENT0131967
Mantoida sp.	French Guiana: Cayenne, 2km E Amazonia, 275m 4.5653 -52.1839 14 February 2005 McCabe, T. (Tim)	CMNHENT0131982
Mantoida sp.	French Guiana: Cayenne, 2km E Amazonia, 275m 4.5653 -52.1839 14 February 2005 McCabe, T. (Tim)	CMNHENT0131983
Mantoida sp.	French Guiana: Cayenne, 2km E Amazonia, 275m 4.5653 -52.1839 14 February 2005 McCabe, T. (Tim)	CMNHENT0131984
Mantoida sp.	French Guiana: Cayenne, 2km E Amazonia, 275m 4.5653 -52.1839 14 February 2005 McCabe, T. (Tim)	CMNHENT0131985
Mantoida sp.	French Guiana: Cayenne, 2km E Amazonia, 275m 4.5653 -52.1839 14 February 2005 McCabe, T. (Tim)	CMNHENT0131986
Mantoida sp.	French Guiana: Cayenne, entrance to Amazonia Lodge, 290m 4.5689 -52.2103 7 January 2013 - 17 January 2013 Romack, H.	CMNHENT0131976
Mantoida sp.	French Guiana: Cayenne, entrance to Amazonia Lodge, 290m 4.5689 -52.2103 7 January 2013 - 17 January 2013 Romack, H.	CMNHENT0131977
Mantoida sp.	French Guiana: Cayenne, entrance to Amazonia Lodge, 290m 4.5689 -52.2103 7 January 2013 - 17 January 2013 Romack, H.	CMNHENT0131978
Mantoida sp.	French Guiana: Cayenne, entrance to Amazonia Lodge, 290m 4.5689 -52.2103 7 January 2013 - 17 January 2013 Romack, H.	CMNHENT0131979
Mantoida sp.	French Guiana: Cayenne, entrance to Amazonia Lodge, 290m 4.5689 -52.2103 7 January 2013 - 17 January 2013 Romack, H.	CMNHENT0131980
Mantoida sp.	French Guiana: Cayenne, entrance to Amazonia Lodge, 290m 4.5689 -52.2103 7 January 2013 - 17 January 2013 Romack, H.	CMNHENT0131981
Mantoida sp.	French Guiana: Cayenne, Kaw Mountain Reserve, 1km W Amazonia, 290m 4.5689 -52.2103 1 February 2008 - 11 February 2008 Romack, H.	CMNHENT0130154
Mantoida sp.	French Guiana: Cayenne, Kaw Mountain Reserve, 1km W Amazonia, 290m 4.5689 -52.2103 22 January 2012 - 31 January 2012 Romack, H.	CMNHENT0131987
Mantoida sp.	French Guiana: Cayenne, Kaw Mountain Reserve, 1km W Amazonia, 290m 4.5689 -52.2103 22 January 2012 - 31 January 2012 Romack, H.	CMNHENT0131988
Mantoida sp.	French Guiana: Cayenne, Kaw Mountain Reserve, 1km W Amazonia, 290m 4.5689 -52.2103 22 January 2012 - 31 January 2012 Romack, H.	CMNHENT0131989
Mantoida sp.	French Guiana: Cayenne, Kaw Mountain Reserve, 1km W Amazonia, 290m 4.5689 -52.2103 7 January 2013 - 17 January 2013 Romack, H.	CMNHENT0130156
Mantoida sp.	French Guiana: Cayenne, Kaw Mountain Reserve, 1km W Amazonia, 290m 4.5689 -52.2103 7 January 2013 - 17 January 2013 Romack, H.	CMNHENT0131975
Mantoida sp.	French Guiana: Cayenne, Kaw Mountain Reserve, vicinity of Patawa, 282m 4.5689 -52.2139 1 April 2011 - 1 May 2011 Rivera, J. at light	CMNHENT0131934
Mantoida sp.	French Guiana: Cayenne, logging road S of Regina, 51.8m 4.1622 -52.1529 4 May 2011 Rivera, J. at light	CMNHENT0131935
Mantoida sp.	French Guiana: Cayenne, logging road S of Regina, 51.8m 4.1622 -52.1529 4 May 2011 Rivera, J. at light	CMNHENT0131968
Mantoida sp.	French Guiana: Cayenne, logging road S of Regina, 51.8m 4.1622 -52.1529 4 May 2011 Rivera, J. at light	CMNHENT0131969
Mantoida sp.	French Guiana: Cayenne, logging road S of Regina, 51.8m 4.1622 -52.1529 4 May 2011 Rivera, J. at light	CMNHENT0131970
Mantoida sp.	French Guiana: Cayenne, logging road S of Regina, 51.8m 4.1622 -52.1529 4 May 2011 Rivera, J. at light	CMNHENT0131972
Mantoida sp.	French Guiana: Cayenne, Saint-Ã‰lie, near Sinnamary, 48m 5.2975 -53.0521 8 May 2011 - 10 May 2011 Rivera, J. at light	CMNHENT0131971
Mantoida sp.	French Guiana: Cayenne, Saint-Ã‰lie, near Sinnamary, 48m 5.2975 -53.0521 8 May 2011 - 10 May 2011 Rivera, J. at light	CMNHENT0131974
Mantoida sp.	French Guiana: Cayenne, vicinity of Cacao, 47.5m 4.568 -52.4665 2 May 2011 - 3 May 2011 Rivera, J. at light	CMNHENT0131936
Mantoida sp.	French Guiana: Patava Mt. 4.8728 -53.302 3 March 1995 Lewis, J. A. mercury vapor light	USNMENT01091432
Mantoida sp.	French Guiana: Saint-Laurent-du-Maroni, 19.5m 5.3423 -54.0715 6 May 2011 - 7 May 2011 Rivera, J. at light	CMNHENT0130155
Mantoida sp.	French Guiana: Saint-Laurent-du-Maroni, 19.5m 5.3423 -54.0715 6 May 2011 - 7 May 2011 Rivera, J. at light	CMNHENT0131973
Mantoida sp.	French Guiana: Saint-Laurent-du-Maroni, 19.5m 5.3423 -54.0715 6 May 2011 - 7 May 2011 Rivera, J. at light	CMNHENT0131993
Mantoida sp.	French Guiana: Saut Athanase at rapide 4.1833 -52.3167 6 March 1995 Lewis, J. A.	USNMENT01091441
Mantoida sp.	Guatemala, Santa Cruz, Zacapa, 15.0167 -89.6833 9 July 2010 - 10 July 2010 Romack, H.	CMNHENT0131991
Mantoida sp.	Guyana, Takutu Mountains 6.25 -59.0833 6 December 1983 Steiner, W. E. (Warren E.), Jr. blacklight trap	USNMENT01091412
Mantoida sp.	Guyana, Wet savanna on Yarrowkabra river, CEIBA Biological Station, Georgetown (about 30 km S of), 6.5003 -58.2181 7 February 2002 Davis, Pogue, G. (George) & Solis	USNMENT01091440
Mantoida sp.	Guyana. Pirara Ranch & River 3.659 -59.7005 23 April 1995 - 27 April 1995 Flint, O. S.	USNMENT01091433
Mantoida sp.	Honduras, 11.7mi S San Antonio, 830m, 14Â°16'N, 87Â°29'W, Comayagua, 14.2667 -87.4833 April 1931 Litz, J. C.	USNMENT01091447
Mantoida sp.	Mexico, Córdoba, VER, 18.9047 -96.9733 1 August 1966 - 10 August 1966 Lau, A. B. (Alfred Bernhard)	USNMENT01091449
Mantoida sp.	Mexico, Córdoba, VER, 18.9047 -96.9733 1 July 1966 - 10 July 1966 Lau, A. B. (Alfred Bernhard)	USNMENT01091451
Mantoida sp.	Mexico, Córdoba, VER, 18.9047 -96.9733 10 August 1966 - 20 August 1966 Lau, A. B. (Alfred Bernhard)	USNMENT01091450
Mantoida sp.	Mexico, San Miguel, Guanajuato 24.2117 -105.1161 7 April 1960 - 22 April 1960 Clarke, J. F. G. (John Frederick Gates)	USNMENT01091406
Mantoida sp.	Nicaragua: Granda Reserva Silvestra Privada Domatila, 68m 11.709 -85.9535 6 November 2010 - 9 November 2010 Svenson, G. J. (Gavin J.)	CMNHENT0130153
Mantoida sp.	Nicaragua: Granda Reserva Silvestra Privada Domatila, 68m 11.709 -85.9535 6 November 2010 - 9 November 2010 Svenson, G. J. (Gavin J.)	CMNHENT0130159
Mantoida sp.	Nicaragua: Granda Reserva Silvestra Privada Domatila, 68m 11.709 -85.9535 6 November 2010 - 9 November 2010 Svenson, G. J. (Gavin J.)	CMNHENT0130160
Mantoida sp.	Nicaragua: Granda Reserva Silvestra Privada Domatila, 68m 11.709 -85.9535 6 November 2010 - 9 November 2010 Svenson, G. J. (Gavin J.)	CMNHENT0131921
Mantoida sp.	Nicaragua: Granda Reserva Silvestra Privada Domatila, 68m 11.709 -85.9535 6 November 2010 - 9 November 2010 Svenson, G. J. (Gavin J.)	CMNHENT0131922
Mantoida sp.	Nicaragua: Granda Reserva Silvestra Privada Domatila, 68m 11.709 -85.9535 6 November 2010 - 9 November 2010 Svenson, G. J. (Gavin J.)	CMNHENT0131961
Mantoida sp.	Nicaragua: Granda Reserva Silvestra Privada Domatila, 68m 11.709 -85.9535 6 November 2010 - 9 November 2010 Svenson, G. J. (Gavin J.)	CMNHENT0131962
Mantoida sp.	Nicaragua: Granda Reserva Silvestra Privada Domatila, 68m 11.709 -85.9535 6 November 2010 - 9 November 2010 Svenson, G. J. (Gavin J.)	CMNHENT0131963
Mantoida sp.	Nicaragua: Granda Reserva Silvestra Privada Domatila, 68m 11.709 -85.9535 6 November 2010 - 9 November 2010 Svenson, G. J. (Gavin J.)	CMNHENT0131964
Mantoida sp.	Nicaragua: Granda Reserva Silvestra Privada Domatila, 68m 11.709 -85.9535 6 November 2010 - 9 November 2010 Svenson, G. J. (Gavin J.)	CMNHENT0131965
Mantoida sp.	Nicaragua: Granda Reserva Silvestra Privada Domatila, 68m 11.709 -85.9535 6 November 2010 - 9 November 2010 Svenson, G. J. (Gavin J.)	CMNHENT0131996
Mantoida sp.	Nicaragua: Granda Reserva Silvestra Privada Domatila, 68m 11.709 -85.9535 6 November 2010 - 9 November 2010 Svenson, G. J. (Gavin J.)	CMNHENT0131997
Mantoida sp.	Nicaragua: Granda Reserva Silvestra Privada Domatila, 68m 11.709 -85.9535 6 November 2010 - 9 November 2010 Svenson, G. J. (Gavin J.)	CMNHENT0131998
Mantoida sp.	Nicaragua: Granda Reserva Silvestra Privada Domatila, 68m 11.709 -85.9535 6 November 2010 - 9 November 2010 Svenson, G. J. (Gavin J.)	CMNHENT0131999
Mantoida sp.	Nicaragua: Granda Reserva Silvestra Privada Domatila, 68m 11.709 -85.9535 6 November 2010 - 9 November 2010 Svenson, G. J. (Gavin J.)	CMNHENT0132000
Mantoida sp.	Panama, Barro Colorado Is., Canal Zone 9.15 -79.85 28 April 1964 - 30 April 1964 Duckworth, W. D. (W. Donald) & Duckworth, S.	USNMENT01091405
Mantoida sp.	Panama, Barro Colorado Is., Canal Zone 9.15 -79.85 28 April 1964 - 30 April 1964 Duckworth, W. D. (W. Donald) & Duckworth, S.	USNMENT01091407
Mantoida sp.	Panama, Barro Colorado Is., Canal Zone, 9.15 -79.85 1 May 1964 - 9 May 1964 Duckworth, W. D. (W. Donald) & Duckworth, S.	USNMENT01091452
Mantoida sp.	Paraguay, Cerro Corá National Park, Amambay Dept. -22.65 -56.1833 7 April 1986 - 10 April 1986 Pogue, M. G. & Solis	USNMENT01091416
Mantoida sp.	Paraguay, Cerro Corá National Park, Amambay Dept. -22.65 -56.1833 7 April 1986 - 10 April 1986 Pogue, M. G. & Solis	USNMENT01091418
Mantoida sp.	Paraguay, Concepción, Concepción Dept. -23.4064 -57.4344 3 April 1986 - 5 April 1986 Pogue, M. G. & Solis	USNMENT01091415
Mantoida sp.	Paraguay, Concepción, Concepción Dept. -23.4064 -57.4344 3 April 1986 - 5 April 1986 Pogue, M. G. & Solis	USNMENT01091417
Mantoida sp.	Peru, Madre de Dios: Tambopata Wildlife: Res. 30 Km. SW Pto. Maldonado: 290 m. -12.5 -69.2 16 November 1979 - 20 November 1979 Heppner, J. B.	USNMENT01091429
Mantoida sp.	Peru: Loreto Province, Madre Selva Biological Research Station -3.621 -72.2474 10 February 2013 - 17 February 2013 Svenson, G. J. (Gavin J.)	CMNHENT0130149
Mantoida sp.	Peru: Loreto Province, Madre Selva Biological Research Station -3.621 -72.2474 10 February 2013 - 17 February 2013 Svenson, G. J. (Gavin J.)	CMNHENT0130150
Mantoida sp.	Peru: Loreto Province, Madre Selva Biological Research Station -3.621 -72.2474 10 February 2013 - 17 February 2013 Svenson, G. J. (Gavin J.)	CMNHENT0130152
Mantoida sp.	Peru: Loreto Province, Madre Selva Biological Research Station -3.621 -72.2474 10 February 2013 - 17 February 2013 Svenson, G. J. (Gavin J.)	CMNHENT0130157
Mantoida sp.	Peru: Loreto Province, Madre Selva Biological Research Station -3.621 -72.2474 10 February 2013 - 17 February 2013 Svenson, G. J. (Gavin J.)	CMNHENT0130158
Mantoida sp.	Peru: Loreto Province, Madre Selva Biological Research Station -3.6216 -72.2503 9 February 2013 - 18 February 2013 Svenson, G. J. (Gavin J.)	CMNHENT0131923
Mantoida sp.	Peru: Loreto Province, Madre Selva Biological Research Station -3.6216 -72.2503 9 February 2013 - 18 February 2013 Svenson, G. J. (Gavin J.)	CMNHENT0131924
Mantoida sp.	Peru: Madre de Dios: Tambopata Wildlife: Res. 30 Km. SW Pto. Maldonado: 290 m. -12.5 -69.2 1982-1983 Anderson, J. J. (Joseph J.)	USNMENT01091434
Mantoida sp.	Peru: Rio Tambopata, Explorer's Inn, -12.8368 -69.2934 2 August 2005 - 13 August 2005 Svenson, G. J. (Gavin J.)	CMNHENT0131995
Mantoida sp.	Peru: Rio Tambopata, Explorer's Inn, -12.8368 -69.2934 2 August 2005 - 13 August 2005 Svenson, G. J. (Gavin J.)	CMNHENT0131994
Mantoida sp.	Trinidad & Tobago, Saint Patrick County, Trinidad, 10.1 61.6 21 July 1986 - 24 July 1986 Romack, H.	CMNHENT0131990
Mantoida sp.	Trinidad & Tobago, Simla Arima Valley 10.4611 -61.2569 1 July 1962 - 15 July 1962 Maldonado, J.	USNMENT01091430
Mantoida sp.	Venezuela 8 -66 1 May 1950 - 25 May 1950 Maldonado Capriles, J. (Jenaro)	USNMENT01091419
Mantoida sp.	Venezuela 8 -66 1 May 1950 - 25 May 1950 Maldonado Capriles, J. (Jenaro)	USNMENT01091420
Mantoida sp.	Venezuela 8 -66 17 February 1976 Flint, C. M. & Flint, O. S., Jr.	USNMENT01091455
Mantoida sp.	Venezuela 8 -66 17 February 1976 Flint, C. M. & Flint, O. S., Jr.	USNMENT01091456
Mantoida sp.	Venezuela, 32km SW Calabozo, Guárico St., 8.7492 -67.6033 14 June 1973 Shaffner, J. C. blacklight trap	USNMENT01091424
Mantoida sp.	Venezuela, 32km SW Calabozo, Guárico St., 8.7492 -67.6033 14 June 1973 Shaffner, J. C. blacklight trap	USNMENT01091425
Mantoida sp.	Venezuela, 32km SW Calabozo, Guárico St., 8.7492 -67.6033 14 June 1973 Shaffner, J. C. blacklight trap	USNMENT01091426
Mantoida sp.	Venezuela, 32km SW Calabozo, Guárico St., 8.7492 -67.6033 14 June 1974 Shaffner, J. C. blacklight trap	USNMENT01091427
Mantoida sp.	Venezuela, 32km SW Calabozo, Guárico St., 8.7492 -67.6033 14 June 1975 Shaffner, J. C. blacklight trap	USNMENT01091428
Mantoida sp.	Venezuela, Amazonas 4.33 -61.76 12 June 1950 Maldonado, J.	USNMENT01091421
Mantoida sp.	Venezuela, Barinas, Barinas St., 8.6226 -70.2075 3 February 1978 - 5 February 1978 Heppner, J. B. blacklight trap	USNMENT01091448
Mantoida sp.	Venezuela, Cerro de la Neblina, base camp, 140m, Amazonas 0.8069 -66.0053 1 March 1984 - 10 March 1984 Davis, D. & McCabe, T. (Tim)	USNMENT01091445
Mantoida sp.	Venezuela, Cerro de la Neblina, base camp, 140m, Amazonas, 0.8069 -66.0053 21 February 1984 - 29 February 1984 Davis, D. & McCabe, T. (Tim)	USNMENT01091443
Mantoida sp.	Venezuela, Cerro de la Neblina, base camp, 140m, Amazonas, 0.8069 -66.0053 21 February 1984 - 29 February 1984 Davis, D. & McCabe, T. (Tim)	USNMENT01091442
Mantoida sp.	Venezuela, Guarico, Hato Masaguaral, (44km S Calabozo) 6.4141 -66.5789 20 May 1985 - 28 May 1985 Menke, A. S. & Carpenter	USNMENT01091422
Mantoida sp.	Venezuela, Guarico, Hato Masaguaral, (44km S Calabozo) 6.4141 -66.5789 3 May 1985 - 10 May 1985 Menke, A. S. & Carpenter	USNMENT01091411
Mantoida sp.	Venezuela, Hato Masaguaral Private Reserve, 75m, savanna #7, 45km S Calabozo, Guárico St., 8.5667 -67.5833 13 May 1988 - 16 May 1988 Epstein, M. & Blahnik, R.	USNMENT01091423
Mantoida sp.	Venezuela, Rio Caura, Puerto Cabello del Caura, Estado Bolivar, 7.1333 -64.9833 8 February 1976 - 9 February 1976 Flint, C. M. & Flint, O. S., Jr.	USNMENT01091453
Mantoida maya	Brazil, Piracicaba, zoo, São Paulo -22.725 -47.6476 1-12-1966 Triplehorn, W. E. (Wanda Elaine) & Triplehorn, C. A. (Charles A.)	USNMENT01091402
Mantoida maya	Panama, Rio Trinidad 9.0025 -79.9617 14 May 1912 Busck, A. (August)	USNMENT01091397
Mantoida maya	Trinidad and Tobago, Saint Augustine, Trinidad Isl., Tunapuna/Piarco Reg., 10.65 -61.4 March 1955 Bennett, F. D. (Fred Douglas)	USNMENT01091395
Mantoida maya	United States, Citrus County 28.87 -82.474 1949 Hetrick, L. A.	USNMENT01091400
Mantoida maya	United States, Florida Keys, Florida 28.7505 -82.5001 29 June 1967 Silberglied, R. (Robert) blacklight trap	USNMENT01091399
Mantoida maya	United States, Florida, Vero Beach, Indian River Co. 27.6386 -80.3972 1 August 1941 - 20 August 1941 Malloch, J.	USNMENT01091401
Mantoida maya	United States, Florida, Vero Beach, Indian River Co. 27.6386 -80.3972 1941 Malloch, J.	USNMENT01091403
Mantoida maya	United States, Florida: Marion Co. Ocala National Forest USFS Road 97, 2.5 miles N of Highway 40, 29.2094 -81.7839 26 July 2002 - 27 July 2002	USNMENT01091404
Mantoida maya	Unknown 4 March 1962	USNMENT01091396
Mantoida maya	Unknown No Date	USNMENT01091398
Mantoida brunneriana	Paraguay, Sapucaí (Sapucay), Paraguarí Dept., -25.6664 -56.9522 No Date Foster, W.	USNMENT01091394
